# Supplementary material for: Comparative analysis of frequency ratio, information value and analytical hierarchy process statistical models for landslide susceptibility mapping in Kashmir Himalayas
Source: Research Square preprint supplement (doi:10.21203/rs.3.rs-2368939/v1), 2022-12-15
Supplement: Supplementary file 1 [file 2fd4ea5bf8af5ee99d65b18f.docx]

Table 7: Table showing increased landslide density from very low to very high susceptible class using different statistical methods.

| Method | Susceptibility zones | Area (Km2) | Landslide area (Km2) | Landslide density |
| --- | --- | --- | --- | --- |
| Information value | Very low | 20.680 | 0.018 | 0.0008 |
|  | Low | 21.260 | 0.064 | 0.0029 |
|  | Moderate | 21.564 | 0.091 | 0.0042 |
|  | High | 20.424 | 0.155 | 0.0075 |
|  | Very high | 20.328 | 0.561 | 0.0276 |
| Frequency ratio | Very low | 20.632 | 0.025 | 0.0012 |
|  | Low | 20.892 | 0.072 | 0.0034 |
|  | Moderate | 21.501 | 0.085 | 0.0039 |
|  | High | 21.111 | 0.111 | 0.0052 |
|  | Very high | 20.120 | 0.594 | 0.0295 |
| Analytical hierarchy process | Very low | 20 | 0.028 | 0.0014 |
|  | Low | 21.41 | 0.0801 | 0.0037 |
|  | Moderate | 21.58 | 0.1089 | 0.0050 |
|  | High | 20.88 | 0.1957 | 0.0093 |
|  | Very high | 20.36 | 0.4759 | 0.0233 |
