# Supplementary material for: Comparative analysis of frequency ratio, information value and analytical hierarchy process statistical models for landslide susceptibility mapping in Kashmir Himalayas
Source: Research Square preprint supplement (doi:10.21203/rs.3.rs-2368939/v1), 2022-12-15
Supplement: Supplementary file 2 [file 3a995599fc16e6b0937d7318.docx]

Table 1: Lithological units of the study area (bhukosh.gsi.gov.in).

| Lithology | Formation | Age | Group |
| --- | --- | --- | --- |
| Alluvium, moraines, hill scree |  | Pleistocene- Holocene | Undifferentiated Quaternary |
| Phyllite, Slate, Carbonaceous Shale, Limestone | Upper Murree | Neoproterozoic | Murree |
| Sandstone, Shale, Siltstone with Limestone | Lower Murree | Eocene-Miocene |  |
| Shale, Sandstone and Siltstone | Gamir and Baila (Undiff.) | Eocene-Miocene |  |
| Shale, Slate, Limestone, Quartz-Arenite | Ramban | Neoproterozoic |  |
