# Supplementary material for: Comparative analysis of frequency ratio, information value and analytical hierarchy process statistical models for landslide susceptibility mapping in Kashmir Himalayas
Source: Research Square preprint supplement (doi:10.21203/rs.3.rs-2368939/v1), 2022-12-15
Supplement: Supplementary file 3 [file 64bb508930f3e7eb2e409000.docx]

Table 5: Factor-wise comparison matrix of causative factors along with their relative weights.

| **No.** | **Causative Factors** | **1** | **2** | **3** | **4** | **5** | **6** | **7** | **8** | **9** | **10** | **11** | **Normalized**  **Eigen weight** |
| --- | --- | --- | --- | --- | --- | --- | --- | --- | --- | --- | --- | --- | --- |
| 1 | Slope | **1** |  |  |  |  |  |  |  |  |  |  | 0.27 |
| 2 | Relative relief | 0.33 | **1** |  |  |  |  |  |  |  |  |  | 0.16 |
| 3 | Drainage density | 0.5 | 0.5 | **1** |  |  |  |  |  |  |  |  | 0.16 |
| 4 | LULC | 0.5 | 0.5 | 0.5 | **1** |  |  |  |  |  |  |  | 0.13 |
| 5 | Distance to Road | 0.13 | 0.17 | 0.14 | 0.17 | **1** |  |  |  |  |  |  | 0.05 |
| 6 | Curvature | 0.14 | 0.17 | 0.17 | 0.2 | 0.5 | **1** |  |  |  |  |  | 0.04 |
| 7 | Lithology | 0.25 | 0.5 | 0.5 | 0.5 | 1 | 1 | **1** |  |  |  |  | 0.07 |
| 8 | TWI | 0.11 | 0.14 | 0.13 | 0.14 | 0.5 | 0.5 | 0.20 | **1** |  |  |  | 0.03 |
| 9 | SPI | 0.11 | 0.14 | 0.13 | 0.13 | 0.5 | 0.5 | 0.20 | 1 | **1** |  |  | 0.03 |
| 10 | Aspect | 0.2 | 0.5 | 0.25 | 0.5 | 0.5 | 0.33 | 0.5 | 0.5 | 0.5 | **1** |  | 0.03 |
| 11 | Distance to fault | 0.14 | 0.33 | 0.33 | 0.33 | 0.33 | 0.33 | 0.33 | 0.5 | 0.5 | 0.5 | **1** | 0.02 |
| **CR = 0.081 CI = 0.123** | | | | | | | | | | | | | |
