# Supplementary material for: Comparative analysis of frequency ratio, information value and analytical hierarchy process statistical models for landslide susceptibility mapping in Kashmir Himalayas
Source: Research Square preprint supplement (doi:10.21203/rs.3.rs-2368939/v1), 2022-12-15
Supplement: Supplementary file 4 [file 6ca62dea201880e091c85a35.docx]

Table 3: RI values and order based on size of matrix

| n | 1 | 2 | 3 | 4 | 5 | 6 | 7 | 8 | 9 | 10 |
| --- | --- | --- | --- | --- | --- | --- | --- | --- | --- | --- |
| RI | 0.0 | 0.0 | 0.58 | 0.90 | 1.12 | 1.24 | 1.32 | 1.41 | 1.45 | 1.51 |
