# Supplementary material for: Comparative analysis of frequency ratio, information value and analytical hierarchy process statistical models for landslide susceptibility mapping in Kashmir Himalayas
Source: Research Square preprint supplement (doi:10.21203/rs.3.rs-2368939/v1), 2022-12-15
Supplement: Supplementary file 5 [file 8a69658755a7354536dd3e7e.docx]

Table 2: Pairwise comparison scale

| No. | Scale | Degree of preference | Description |
| --- | --- | --- | --- |
| 1 | 1 | Equally important | Two factors contributing equally to the object |
| 2 | 3 | Moderately important | Experience and judgment slightly to moderately favour  one factor over another |
| 3 | 5 | Strongly important | Experience and judgements strongly or essentially favor  one factor over another |
| 4 | 7 | Very strongly important | Judgements and experience strongly favored over  another and its dominance demonstrate in practice |
| 5 | 9 | Extremely important | The evidence favoring one criterion over another is of  the highest possible order of an affirmation |
| 6 | 2,4,6 and 8 | Intermediate | When compromise is needed |
