# Supplementary material for: Comparative analysis of frequency ratio, information value and analytical hierarchy process statistical models for landslide susceptibility mapping in Kashmir Himalayas
Source: Research Square preprint supplement (doi:10.21203/rs.3.rs-2368939/v1), 2022-12-15
Supplement: Supplementary file 6 [file b578aa831e7ff0ee70f93003.docx]

Table 6a: Factor class comparison of morphological factors along with their relative weights

| No. | Factor classes |  | 1 | 2 | 3 | 4 | 5 | 6 | 7 | 8 | Normalized  Eigen weight |
| --- | --- | --- | --- | --- | --- | --- | --- | --- | --- | --- | --- |
|  | Aspect | North | **1** |  |  |  |  |  |  |  | 0.12 |
|  |  | North-East | 0.33 | **1** |  |  |  |  |  |  | 0.03 |
|  |  | East | 2 | 0.33 | **1** |  |  |  |  |  | 0.14 |
|  |  | South-East | 0.33 | 3 | 0.2 | **1** |  |  |  |  | 0.04 |
|  |  | South | 5 | 7 | 2 | 7 | **1** |  |  |  | 0.38 |
|  |  | South-west | 0.33 | 2 | 0.2 | 3 | 0.14 | **1** |  |  | 0.06 |
|  |  | West | 2 | 5 | 1 | 6 | 0.25 | 4 | **1** |  | 0.19 |
|  |  | North-West | 0.25 | 1 | 0.25 | 1 | 0.2 | 0.5 | 0.25 | **1** | 0.04 |
| **CR = 0.04 CI = 0.06** | | | | | | | | | | | |
|  | Curvature | concave | **1** |  |  |  |  |  |  |  | 0.26 |
|  |  | planar | 0.25 | **1** |  |  |  |  |  |  | 0.07 |
|  |  | convex | 3 | 8 | **1** |  |  |  |  |  | 0.67 |
| **CR = 0.01 CI = 0.01** | | | | | | | | | | | |
|  | Slope | <15° | **1** |  |  |  |  |  |  |  | 0.05 |
|  |  | 15°-25° | 3 | **1** |  |  |  |  |  |  | 0.10 |
|  |  | 25°-35° | 3 | 2 | **1** |  |  |  |  |  | 0.17 |
|  |  | 35°-45° | 5 | 3 | 2 | **1** |  |  |  |  | 0.27 |
|  |  | >45° | 5 | 5 | 2 | 2 | **1** |  |  |  | 0.40 |
| **CR = 0.03 CI = 0.03** | | | | | | | | | | | |
|  | Relative relief | 56-179.77 | **1** |  |  |  |  |  |  |  | 0.05 |
|  |  | 179.77-241.63 | 2 | **1** |  |  |  |  |  |  | 0.07 |
|  |  | 241.63-313.79 | 3 | 2 | **1** |  |  |  |  |  | 0.10 |
|  |  | 313.79-396.27 | 4 | 5 | 6 | **1** |  |  |  |  | 0.27 |
|  |  | 396.27-581.84 | 7 | 6 | 5 | 4 | **1** |  |  |  | 0.52 |
| **CR = 0.09 CI = 0.10** | | | | | | | | | | | |

Table 6b: Factor class comparison of hydrological factors along with their relative weights.

| No. | Factor classes |  | 1 | 2 | 3 | 4 | 5 | 6 | 7 | 8 | Normalized  Eigen weight |
| --- | --- | --- | --- | --- | --- | --- | --- | --- | --- | --- | --- |
|  | TWI | <5 | **1** |  |  |  |  |  |  |  | 0.22 |
|  |  | 5-10 | 0.33 | **1** |  |  |  |  |  |  | 0.10 |
|  |  | 10-15 | 0.14 | 0.25 | **1** |  |  |  |  |  | 0.04 |
|  |  | >15 | 5 | 7 | 9 | **1** |  |  |  |  | 0.64 |
| **CR = 0.09 CI = 0.09** | | | | | | | | | | | |
|  | SPI | -13.81- -4.25 | **1** |  |  |  |  |  |  |  | 0.09 |
|  |  | -4.25-0.62 | 1 | **1** |  |  |  |  |  |  | 0.08 |
|  |  | 0.62-3.01 | 5 | 6 | **1** |  |  |  |  |  | 0.42 |
|  |  | 3.01-11.58 | 6 | 5 | 1 | **1** |  |  |  |  | 0.42 |
| **CR = 0.09 CI = 0.08** | | | | | | | | | | | |
|  | Drainage density | 0.05-1.41 | **1** |  |  |  |  |  |  |  | 0.47 |
|  |  | 1.41-1.88 | 0.5 | **1** |  |  |  |  |  |  | 0.25 |
|  |  | 1.88-2.42 | 0.50 | 0.33 | **1** |  |  |  |  |  | 0.18 |
|  |  | 2.42-3.96 | 0.33 | 0.5 | 0.25 | **1** |  |  |  |  | 0.10 |
| **CR = 0.09 CI = 0.08** | | | | | | | | | | | |

Table 6c: Factor class comparison of geological factors along with their relative weights.

| No. | Factor classes |  | 1 | 2 | 3 | 4 | 5 | 6 | 7 | 8 | Normalized  Eigen weight |
| --- | --- | --- | --- | --- | --- | --- | --- | --- | --- | --- | --- |
|  | Distance to fault (m) | <500 | **1** |  |  |  |  |  |  |  | 0.23 |
|  |  | 500-1000 | 5 | **1** |  |  |  |  |  |  | 0.71 |
|  |  | >1000 | 0.25 | 0.12 | **1** |  |  |  |  |  | 0.07 |
| **CR = 0.08 CI = 0.04** | | | | | | | | | | | |
|  | Lithology | phyllite, slate, carbonaceous shale, limestone | **1** |  |  |  |  |  |  |  | 0.39 |
|  |  | sandstone, shale, siltstone with limestone | 0.14 | **1** |  |  |  |  |  |  | 0.09 |
|  |  | shale, slate, limestone & quartz-arenite | 1 | 8 | **1** |  |  |  |  |  | 0.40 |
|  |  | alluvium, moraines, hillwash & scree | 0.17 | 0.50 | 0.2 | **1** |  |  |  |  | 0.06 |
|  |  | shale, sandstone and siltstone | 0.2 | 0.25 | 0.17 | 1 | **1** |  |  |  | 0.05 |
| **CR = 0.08 CI = 0.09** | | | | | | | | | | | |

Table 6d: Factor class comparison of other factors along with their relative weights.

| No. | Factor classes |  | 1 | 2 | 3 | 4 | 5 | 6 | 7 | 8 | Normalized  Eigen weight |
| --- | --- | --- | --- | --- | --- | --- | --- | --- | --- | --- | --- |
|  | Distance to road (m) | <100 | **1** |  |  |  |  |  |  |  | 0.43 |
|  |  | 100-200 | 0.50 | **1** |  |  |  |  |  |  | 0.24 |
|  |  | 200-300 | 0.25 | 0.50 | **1** |  |  |  |  |  | 0.17 |
|  |  | 300-400 | 0.17 | 0.33 | 0.33 | **1** |  |  |  |  | 0.09 |
|  |  | 400-500 | 0.125 | 0.20 | 0.2 | 0.33 | **1** |  |  |  | 0.05 |
| **CR = 0.05 CI = 0.06** | | | | | | | | | | | |
|  | LULC | Dense Forest | **1** |  |  |  |  |  |  |  | 0.06 |
|  |  | Sparsely dense | 1 | **1** |  |  |  |  |  |  | 0.07 |
|  |  | Grassland | 3 | 2 | **1** |  |  |  |  |  | 0.12 |
|  |  | Agriculture | 0.50 | 1 | 0.25 | **1** |  |  |  |  | 0.06 |
|  |  | Settlement | 5 | 4 | 2 | 2 | **1** |  |  |  | 0.18 |
|  |  | Barren | 8 | 6 | 5 | 7 | 7 | **1** |  |  | 0.48 |
|  |  | Waterbody | 0.5 | 0.33 | 0.5 | 0.5 | 0.20 | 0.17 | **1** |  | 0.04 |
| **CR = 0.07 CI = 0.09** | | | | | | | | | | | |
