# Supplementary material for: Comparative analysis of frequency ratio, information value and analytical hierarchy process statistical models for landslide susceptibility mapping in Kashmir Himalayas
Source: Research Square preprint supplement (doi:10.21203/rs.3.rs-2368939/v1), 2022-12-15
Supplement: Supplementary file 7 [file d9b528435378c301fa229109.docx]

Table 4a: Information value and Frequency ratio of morphological factor classes.

| No | Causative  Factor | Factor classes | nslpix (Si) | ncpix (Ni) | Ls area  (%) | Class (%) | Information  Value | FR |
| --- | --- | --- | --- | --- | --- | --- | --- | --- |
| 01 | Aspect | North | 748 | 120927 | 12.31 | 17.35 | -0.138 | 0.710 |
|  |  | North-East | 870 | 123452 | 15.72 | 18.66 | -0.081 | 0.842 |
|  |  | East | 864 | 90545 | 14.86 | 13.43 | 0.049 | 1.106 |
|  |  | South-East | 679 | 70993 | 11.62 | 10.66 | 0.050 | 1.091 |
|  |  | South | 1127 | 87031 | 20.02 | 13.20 | 0.182 | 1.517 |
|  |  | South-west | 852 | 72796 | 15.59 | 11.14 | 0.138 | 1.400 |
|  |  | West | 158 | 35613 | 2.66 | 5.28 | -0.282 | 0.506 |
|  |  | North-West | 395 | 67621 | 7.18 | 10.28 | | -0.163 | | --- | | 0.699 |
| 02 | Curvature | concave | 1476 | 162172 | 47.66 | 24.24 | 0.029 | 1.966 |
|  |  | planar | 2713 | 344731 | 25.93 | 51.53 | -0.03 | 0.503 |
|  |  | convex | 1504 | 162075 | 26.42 | 24.23 | 0.037 | 1.090 |
| 03 | Slope | <15° | 147 | 110183 | 2.58 | 16.47 | -0.804 | 0.157 |
|  |  | 15°-25° | 684 | 186875 | 12.01 | 27.93 | -0.366 | 0.430 |
|  |  | 25°-35° | 1501 | 184920 | 26.37 | 27.64 | -0.020 | 0.954 |
|  |  | 35°-45° | 2273 | 133009 | 39.93 | 19.88 | 0.302 | 2.008 |
|  |  | >45° | 1088 | 53991 | 19.11 | 8.07 | 0.374 | 2.368 |
| 04 | Relative relief (m) | 56-179.77 | 97 | 102472 | 1.70 | 15.32 | -0.953 | 0.111 |
|  |  | 179.77-241.63 | 1427 | 248717 | 25.07 | 37.18 | -0.171 | 0.674 |
|  |  | 241.63-313.79 | 1198 | 144801 | 21.04 | 21.65 | -0.012 | 0.972 |
|  |  | 313.79-396.27 | 1323 | 101181 | 23.24 | 15.12 | 0.186 | 1.536 |
|  |  | 396.27-581.84 | 1648 | 71807 | 28.95 | 10.73 | 0.430 | 2.697 |

4b: Information value and Frequency ratio of hydrological factor classes.

| 05 | TWI | <5 | 2014 | 208456 | 35.38 | 31.16 | 0.055 | 1.135 |
| --- | --- | --- | --- | --- | --- | --- | --- | --- |
|  |  | 5-10 | 2479 | 290860 | 43.54 | 43.48 | 0.001 | 1.002 |
|  |  | 10-15 | 161 | 135321 | 2.83 | 20.23 | -0.854 | 0.140 |
|  |  | >15 | 1039 | 34341 | 18.25 | 5.13 | 0.550 | 3.555 |
| 06 | SPI | -13.81- -4.25 | 524 | 92839 | 9.204 | 13.88 | -0.178 | 0.663 |
|  |  | -4.25-0.62 | 1092 | 199625 | 19.181 | 29.84 | -0.191 | 0.643 |
|  |  | 0.62-3.01 | 3204 | 297760 | 56.280 | 44.51 | 0.101 | 1.264 |
|  |  | 3.01-11.58 | 873 | 78754 | 15.335 | 11.77 | 0.114 | 1.303 |
| 07 | Drainage density | 0.05-1.41 | 347 | 105000 | 11.12 | 16.12 | -0.410 | 0.690 |
|  |  | 1.41-1.88 | 2182 | 217837 | 50.11 | 38.71 | 0.070 | 1.294 |
|  |  | 1.88-2.42 | 2114 | 241936 | 31.34 | 33.58 | 0.011 | 0.933 |
|  |  | 2.42-3.96 | 1050 | 104205 | 7.43 | 11.59 | 0.073 | 0.641 |

4c: Information value and Frequency ratio of different factor classes Geological factor classes

| 08 | Distance to Fault (m) | <500 | 1676 | 122924 | 29.44 | 18.37 | 0.204 | 1.602 |
| --- | --- | --- | --- | --- | --- | --- | --- | --- |
|  |  | 500-1000 | 1850 | 100406 | 32.50 | 15.01 | 0.335 | 2.165 |
|  |  | >1000 | 2167 | 445648 | 38.06 | 66.62 | -0.243 | 0.571 |
| 09 | Lithology | phyllite, slate, carbonaceous shale, limestone | 3011 | 188497 | 52.89 | 28.18 | 0.273 | 1.877 |
|  |  | sandstone, shale, siltstone with limestone | 70 | 8912 | 1.23 | 1.33 | -0.034 | 0.923 |
|  |  | shale, slate, limestone & quartz-arenite | 149 | 8650 | 2.62 | 1.29 | 0.306 | 2.024 |
|  |  | alluvium, moraines, hillwash & scree | 187 | 35262 | 3.28 | 5.27 | -0.205 | 0.623 |
|  |  | shale, sandstone and siltstone | 2276 | 427657 | 39.98 | 63.93 | -0.203 | 0.625 |

4d: Information value and Frequency ratio of other factor classes.

| 10 | LULC | Dense Forest | 619 | 260648 | 10.87 | 38.97 | -0.554 | 0.279 |
| --- | --- | --- | --- | --- | --- | --- | --- | --- |
|  |  | Sparsely dense | 23 | 8870 | 0.40 | 1.33 | -0.516 | 0.305 |
|  |  | Grassland | 2435 | 290064 | 42.77 | 43.37 | -0.006 | 0.986 |
|  |  | Agriculture | 10 | 37109 | 0.18 | 5.55 | -1.499 | 0.032 |
|  |  | settlement | 188 | 8525 | 3.30 | 1.27 | 0.413 | 2.591 |
|  |  | Barren | 2418 | 58652 | 42.47 | 8.77 | 0.685 | 4.843 |
| 11 | Distance to Road (m) | <100 | 2928 | 149692 | 51.43 | 22.38 | 0.361 | 2.298 |
|  |  | 100-200 | 524 | 109491 | 9.20 | 16.37 | -0.249 | 0.562 |
|  |  | 200-300 | 479 | 85759 | 8.41 | 12.82 | -0.182 | 0.656 |
|  |  | 300-400 | 428 | 65485 | 7.52 | 9.79 | -0.1146 | 0.768 |
|  |  | 400-500 | 259 | 49923 | 4.55 | 7.46 | -0.214 | 0.610 |
